# Supplementary material for: Optimization Studies and Compositional Oil Analysis of Pequi (Caryocar brasiliense Cambess) Almonds by Supercritical CO2 Extraction
Source: MDPI journal article supplement (doi:10.3390/molecules28031030), 2023-01-19
Supplement: s1 [file s1]

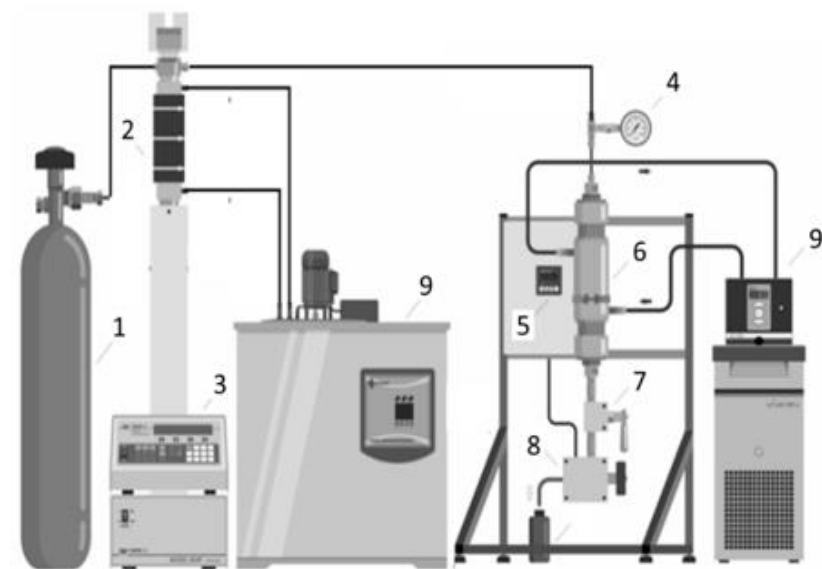

**Figure S1.** Schematic of the experimental supercritical extraction unit:1-CO<sub>2</sub> cylinder; 2-Syringe pump; 3-Thermostatic bath; 4-Pressure indicator; 5-Temperature controller/indicator; 6-Extractor; 7-Valve; 8-Needle-type valve attached to an aluminum jacket for heating; 9-Thermostatic bath.
